1 **Using the Tea Bag Index to unravel how interactions between an antibiotic**  
2 **(Trimethoprim) and endocrine disruptor (17 $\alpha$ -estradiol) affect aquatic microbial**  
3 **activity.**

4 William Ross Hunter<sup>1\*</sup>; Ashley Williamson<sup>1</sup>; Judith Maria Sarneel<sup>2</sup>

5 <sup>1</sup>University of Ulster, School of Geography and Environmental Science, Coleraine,  
6 BT52 1SA, United Kingdom

7 <sup>2</sup>Umeå Universitet, Department of Ecology and Environmental Sciences, 901 87  
8 Umeå, Sweden

9 \*Corresponding Author. Email: w.hunter@ulster.ac.uk

10 **Abstract**

11 **The constant release of complex mixture of pharmaceuticals, including**  
12 **antimicrobials and endocrine disruptors, into the aquatic environment. These**  
13 **have the potential to affect aquatic microbial metabolism and alter**  
14 **biogeochemical cycling of carbon and nutrients. Here we advance the Tea Bag**  
15 **Index (TBI) for decomposition by using it in a series of contaminant exposure**  
16 **experiments to test how interactions between an antibiotic (trimethoprim) and**  
17 **endocrine disruptor (17 $\alpha$ -estradiol) affects microbial activity in an aquatic**  
18 **system. The TBI is a citizen science tool used to test microbial activity by**  
19 **measuring the differential degradation of green and rooibos tea as proxies for**  
20 **labile and recalcitrant organic matter decomposition. Exposure to**  
21 **trimethoprim and 17 $\alpha$ -estradiol had significant independent negative effects**  
22 **upon decomposition of labile organic matter (green tea), suggesting additive**  
23 **effects upon microbial activity. Exposure to 17 $\alpha$ -estradiol alone negatively**  
24 **affected the degradation of more recalcitrant organic matter (rooibos tea).**  
25 **Consequently, trimethoprim and 17 $\alpha$ -estradiol stabilized labile organic matter**  
26 **against microbial degradation and restricted degradation rates. We propose**  
27 **that the method outlined could provide a powerful tool for testing the impacts**  
28 **of multiple interacting pollutants upon microbial activity, at a range of scales,**  
29 **across aquatic systems and over biogeochemically relevant time scales.**

## 30 **Main Text**

31 Globally, pharmaceutical use has increased by ~ 3 % per annually since the year  
32 2000 leading to a constant discharge of these compounds into the aquatic  
33 environment via both point (Waste Water Treatment Works and Septic Tanks) and  
34 diffuse sources (e.g. agricultural run-off) (Rosi-Marshall & Royer, 2012; Van Boeckel  
35 et al, 2014; Gros et al, 2007). Although this results in low concentrations of those  
36 elements, they could affect natural stream processes because pharmaceuticals are  
37 designed to be effective at micromolar or nanomolar concentrations.

38 Pharmaceuticals have the potential to affect the microbial processes which control  
39 aquatic carbon and nitrogen cycling (Brodin et al, 2014; Rosi-Marshall & Royer,  
40 2012). The specific effects of pharmaceuticals in the environment are likely to be  
41 complex as a consequence of the myriad of potentially interactions between these  
42 compounds (Hernando et al, 2006). As such, we need to understand how  
43 pharmaceuticals influence microorganism-mediated ecosystem processes.

44 Contaminant exposure experiment provides a powerful tool for testing the sensitivity  
45 of aquatic microbial communities to pharmaceuticals and other pollutants (Tank et al,  
46 2006; Costello et al, 2015). A well-refined method is provided by Costello et al (2015)  
47 to test how pharmaceuticals affect microbial biofilm growth and community structure  
48 and ecophysiological responses of the biofilm, such as community respiration  
49 (Rosi-Marshall et al, 2013; McClean & Hunter, 2019). However, this method cannot  
50 provide information on biogeochemical processes such as the degradation organic  
51 matter, which occurs over times-scales measured in weeks or months (Vannote et  
52 al, 1980; Raymond & Bauer, 2001). The Tea Bag Index (TBI) provides a powerful  
53 low-cost tool for investigating microbial activity in soils and aquatic systems, based  
54 upon the traditional use of leaf-litter bags in ecology (Keuskamp et al, 2013; Seelen  
55 et al, 2019). The key strength of TBI is its ability to provide a standardized method of  
56 quantifying microbial activity by comparing the relative degradation of a labile (green  
57 tea) and recalcitrant (rooibos tea) organic matter source. The use of TBI within  
58 contaminant exposure experiments will, therefore, allow the impacts of exposure to a  
59 pollutant to be quantified in terms of microbially-mediated organic matter  
60 degradation.

61 Antibiotics and endocrine disruptors represent some of the most widely detected  
62 pharmaceuticals in the environment (Álvarez-Muñoz et al, 2015; Archer et al, 2017;  
63 Rosi-Marshall & Royer, 2012), with both known to have significant effects upon the  
64 structure of aquatic microbial communities (Wieser et al 2016; Yuan et al 2017).  
65 Consequently, interactions between antibiotics and endocrine disruptors are of  
66 potential environmental relevance. We tested interactions between a broad-spectrum  
67 antibiotic (Trimethoprim) and the endocrine disruptor (17 $\alpha$ -estradiol) affect in-stream  
68 microbial activity, using a modified contaminant exposure experiments (see  
69 supplementary methods). Briefly, we constructed contaminant exposure experiments  
70 out of 120 ml screw-cap vials with a 3.5 cm diameter hole bored into the lid. We  
71 prepared 40 vials containing 100 ml of 2 % agar gel of which ten were spiked with  
72 either a 688  $\mu\text{mol}\cdot\text{l}^{-1}$  dose of Trimethoprim, or 688  $\mu\text{mol}\cdot\text{l}^{-1}$  dose of 17 $\alpha$ -estradiol. Ten  
73 others were spiked with a 688  $\mu\text{mol}\cdot\text{l}^{-1}$  dose of both Trimethoprim and 17 $\alpha$ -estradiol,  
74 and ten controls containing no pharmaceuticals, only agar. We placed one pre-  
75 weighed Lipton Green Teabag (EAN 87 22700 05552 5) and one pre-weighed Lipton  
76 Rooibos Teabag (EAN 87 22700 18843 8) in non-woven bags in the headspace of  
77 each vial. The experiments were placed into a suburban stream and incubated for 83  
78 days between March and June 2019. We quantified mass loss of the green and  
79 rooibos tea bags after drying the bags (72 h at 65°C), and calculated the stabilization  
80 factor (S) and initial decomposition rate (k) of the labile organic material (following  
81 Keuskamp et al, 2013). We tested for significant treatment effects using two-way  
82 analysis of variance.

83 Over the course of the experiment, dissolution of the agar delivered estimated daily  
84 doses of approximately 275  $\text{nmol}\cdot\text{d}^{-1}$  of trimethoprim and 17 $\alpha$ -estradiol in both the  
85 single and combined pharmaceutical treatments (see supplementary methods).  
86 Rooibos Tea mass loss decreased upon 17 $\alpha$ -estradiol exposure, with no  
87 additional/significant effect of Trimethoprim (Figure 1 A). By contrast for green tea,  
88 we observed additive and inhibiting effects of both trimethoprim and 17 $\alpha$ -estradiol  
89 (Figure 1 B). Based on these data we can demonstrate that pharmaceutical pollution  
90 by 17 $\alpha$ -estradiol and trimethoprim increased both stabilization factor (Figure 2 A),  
91 initial decomposition rate (Figure 2 B) of the labile organic matter within the teabags.  
92 Although, the difference in stabilization between treatments with and without 17 $\alpha$ -  
93 estradiol were not as big as when trimethoprim was present, the interaction was not

94 significant (see supplementary results). This indicates significant independent effects  
95 of trimethoprim and 17 $\alpha$ -estradiol upon microbial activity.

96 Our results demonstrate that chronic exposure to low doses of both an antibiotic  
97 (trimethoprim) and an endocrine disruptor (17 $\alpha$ -estradiol) inhibits microbial  
98 degradation, with differential effects on different phases of the decomposition  
99 process. Chronic exposure to both an antibiotic and endocrine disruptor have  
100 significant additive positive effects upon both the initial decomposition rate ( $k$ ) and  
101 stabilization factor ( $s$ ) of labile organic matter. The latter may increase the residence  
102 time for organic matter in aquatic systems. Inland waters (rivers, lakes and streams)  
103 typically receive large inputs of terrestrial organic matter, which is then partially  
104 metabolized, temporarily buried within the sediment or transported to the ocean  
105 (Battin et al, 2009). Thus, the combined effects of multiple pharmaceutical  
106 contaminants are likely to have important implications for the global carbon and  
107 nutrient cycles.

108 By integrating TBI into contaminant exposure experiments we have developed a low-  
109 cost tool to quantify how chronic pollutant exposure affects instream decomposition  
110 over biogeochemically relevant time-scales. Whilst our study was restricted to one  
111 stream, this method can easily be replicated at multiple sites. We therefore foresee  
112 two important applications as it would allow sensitivity analysis of microbial  
113 responses to multiple pollutants to be made (i) across large spatial and temporal  
114 scales and (ii) in increasingly complex experimental designs testing the interactions  
115 between multiple chemical pollutants on decomposition in both freshwater and  
116 marine systems. [992 words]

## 117 **Author Contributions**

118 Experiments were designed by WRH following discussions with JS, and were  
119 conducted by WRH and AW. All authors contributed to the writing of the manuscript.

## 120 **Acknowledgements**

121 This work was funded through start-up funds provided to WRH by the University of  
122 Ulster School of Geography and Environmental Science. JMS acknowledges the  
123 Swedish Research Council (Vetenskapsrådet) for funding.

## 124 **References**

- 125 Álvarez-Muñoz D, Rodríguez-Mozaz S, Maulvault AL, Tediosi A, Fernández-Tejedor  
126 M, Van den Heuvel F, *et al.* (2015). Occurrence of pharmaceuticals and endocrine  
127 disrupting compounds in macroalgae, bivalves, and fish from coastal areas in  
128 Europe. *Environmental Research* 143:56-64.
- 129 Archer E, Petrie B, Kasprzyk-Hordern B, Wolfaardt GM (2017). The fate of  
130 pharmaceuticals and personal care products (PPCPs), endocrine disrupting  
131 contaminants (EDCs), metabolites and illicit drugs in a WWTW and environmental  
132 waters. *Chemosphere* 174:437-446.
- 133 Battin TJ, Luysaert S, Kaplan LA, Aufdenkampe AK, Richter A, Tranvik LJ (2009).  
134 The boundless carbon cycle. *Nature Geoscience* 2:598.
- 135 Brodin T, Piovano S, Fick J, Klaminder J, Heynen M, Jonsson M (2014). Ecological  
136 effects of pharmaceuticals in aquatic systems: impacts through behavioural alter-  
137 ations. *Philosophical Transactions of the Royal Society of London B: Biological*  
138 *Sciences* 369:20130580.
- 139 Costello DM, Rosi-Marshall EJ, Shaw LE, Grace M, Kelly JJ (2015). A novel method  
140 to assess effects of chemical stressors on natural biofilm structure and function.  
141 *Freshwater Biology* 61:2129-2140.
- 142 Gros M, Petrović M, Barcelo D (2007). Wastewater treatment plants as a pathway for  
143 aquatic contamination by pharmaceuticals in the Ebro river basin (northeast Spain).  
144 *Environmental Toxicology and Chemistry* 26:1553-1562.
- 145 Hernando MD, Mezcuca M, Fernández-Alba AR, Barceló D (2006). Environmental  
146 risk assessment of pharmaceutical residues in wastewater effluents, surface waters  
147 and sediments. *Talanta* 69:334-342.
- 148 Keuskamp JA, Dingemans BJJ, Lehtinen T, Sarneel JM, Hefting MM (2013). Tea  
149 Bag Index: a novel approach to collect uniform decomposition data across  
150 ecosystems. *Methods Ecol Evol* 4:1070-1075.
- 151 McClean P, Hunter WR (2019). 17 $\alpha$ -Estradiol limits the impact of ibuprofen upon  
152 community respiration by streambed biofilms in a sub-urban stream. *bioRxiv*  
153 :718924, doi:10.1101/718924.
- 154 Raymond PA, Bauer JE (2001). Riverine export of aged terrestrial organic matter to  
155 the North Atlantic Ocean. *Nature* 409:497-500.

- 156 Rosi-Marshall EJ, Kincaid DWL, Bechtold H, Royer TV, Rojas M, Kelly JJ (2013).  
157 Pharmaceuticals suppress algal growth and microbial respiration and alter bacterial  
158 communities in stream biofilms. *Ecological Applications* 23:583-593.
- 159 Rosi-Marshall EJ, Royer TV (2012). Pharmaceutical compounds and ecosystem  
160 function: an emerging research challenge for aquatic ecologists. *Ecosystems*.  
161 15:867-880.
- 162 Seelen LMS, Flaim G, Keuskamp J, Teurlincx S, Arias Font R, Tolunay D, *et al.*  
163 (2019). An affordable and reliable assessment of aquatic decomposition: Tailoring  
164 the Tea Bag Index to surface waters. *Water Research* 151:31-43,  
165 doi:<https://doi.org/10.1016/j.watres.2018.11.081>.
- 166 Tank JL, Bernot MJ, Rosi-Marshall EJ (2006). Nitrogen limitation and uptake. In:  
167 *Methods in Stream Ecology*. Academic Press: San Diego, CA., pp 213-238.
- 168 Van Boeckel TP, Gandra S, Ashok A, Caudron Q, Grenfell BT, Levin SA, *et al.*  
169 (2014). Global antibiotic consumption 2000 to 2010: an analysis of national  
170 pharmaceutical sales data. *Lancet Infectious Diseases* 14:742-750.
- 171 Vannote RL, Minshall GW, Cummins KW, Sedell JR, Cushing CE (1980). The River  
172 Continuum Concept. *Can J Fish Aquat Sci* 37:130-137.
- 173 Waiser MJ, Swerhone GD, Roy J, Tumber V, Lawrence JR (2016). Effects of  
174 erythromycin, trimethoprim and clindamycin on attached microbial communities from  
175 an effluent dominated prairie stream. *Ecotoxicol Environ Saf* 132: 31-39. doi:  
176 [10.1016/j.ecoenv.2016.05.026](https://doi.org/10.1016/j.ecoenv.2016.05.026).
- 177 Yuan K, Xiao S, Jiang X, Yang L, Chen B, Luan T, Lin L, Tam Nfy (2017). Effects of  
178 endocrine disrupting chemicals (EDCs) on bacterial communities in mangrove  
179 sediments. *Mar Pollut Bull* 122: 122-128
- 180

181 **Figures**

182 Figure 1. Effects of Trimethprim (💊) and 17a-estradiol (♀) on the degradation (%  
183 mass loss) of A) Green Tea and B) Rooibos Tea, as labile and refractory organic  
184 matter sources. Inserts show pooled data where significant independent effects of  
185 either Trimethoprim or 17a-estradiol where detected. Significance levels: \*\*\*  $p <$   
186 0.001; \*\*  $p < 0.01$ ; \*  $p < 0.05$ .

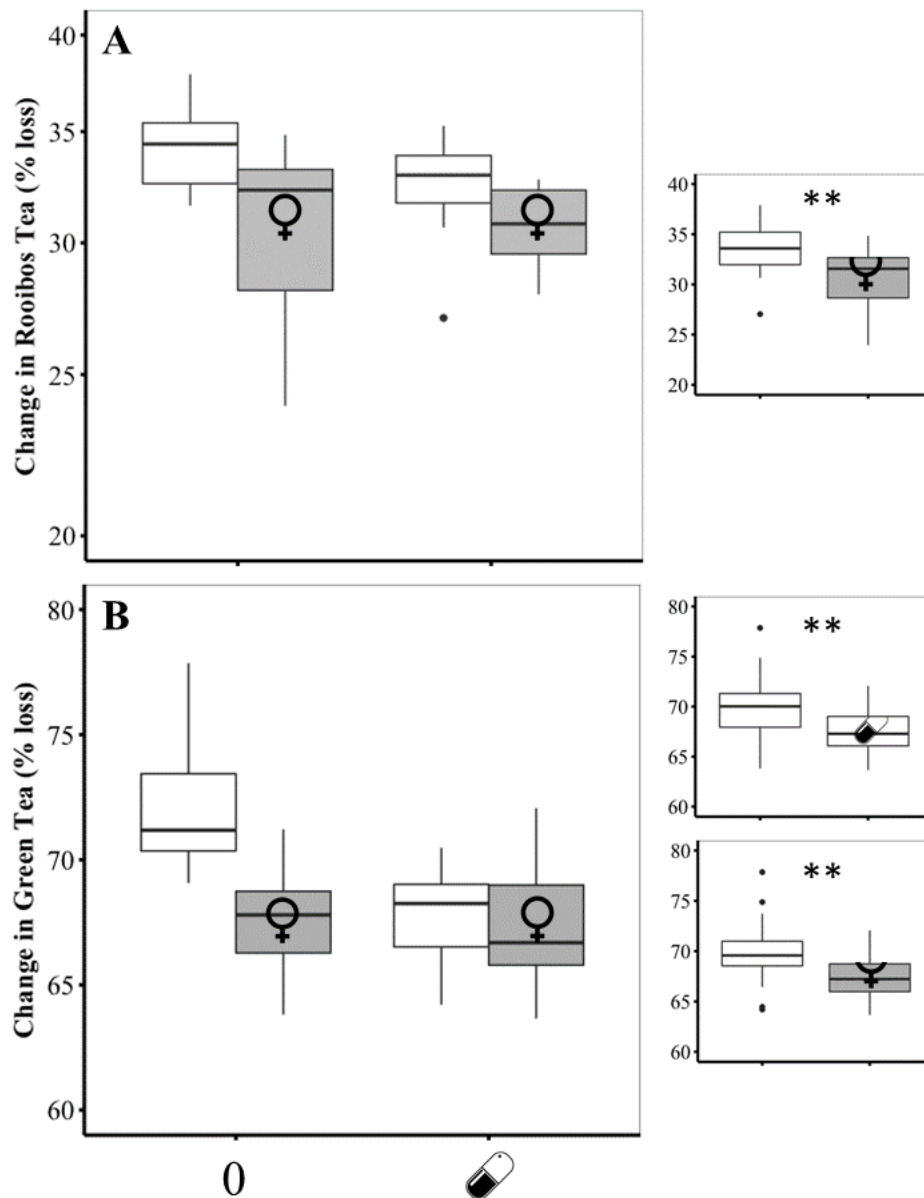

187  
188

189 Figure 2. Effects of Trimethprim (💊) and 17 $\alpha$ -estradiol( ♀) on the A) labile organic  
190 matter stabilization factor and B) organic matter degradation rate, calculated  
191 following Keuskamp et al (2013). Inserts show pooled data where significant  
192 independent effects of either Trimethoprim or 17 $\alpha$ -estradiol were detected.  
193 Significance levels: \*\*\*  $p < 0.001$ ; \*\*  $p < 0.01$ ; \*  $p < 0.05$ .

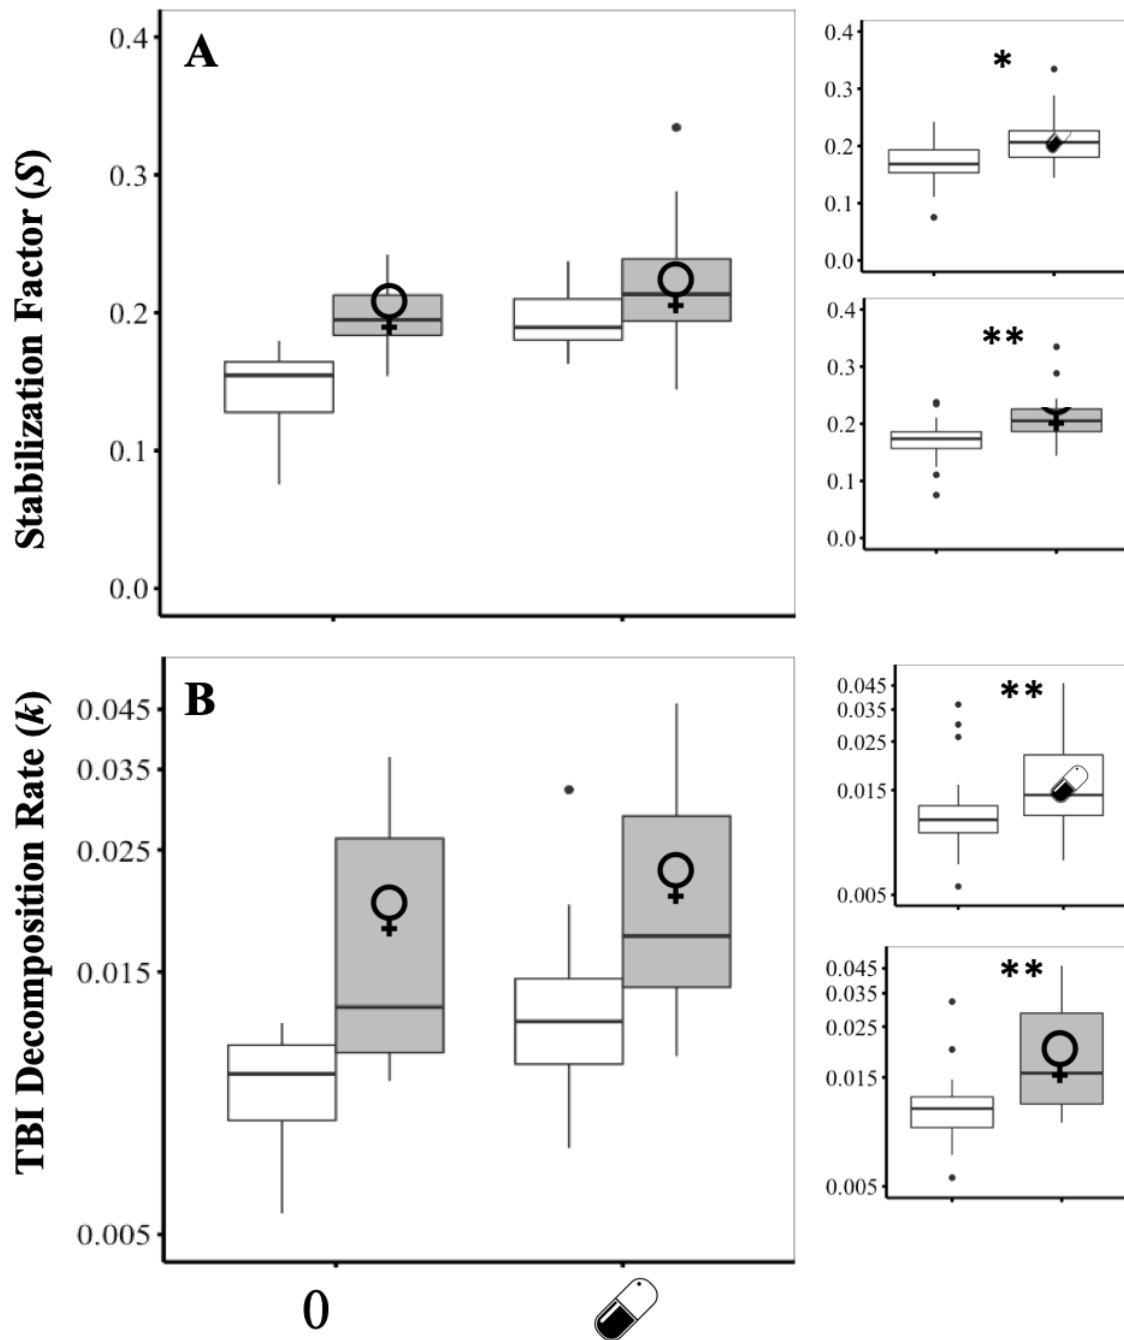

194

195



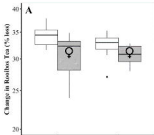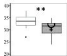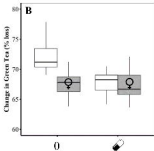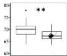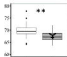

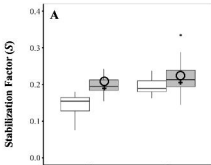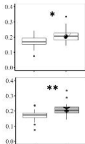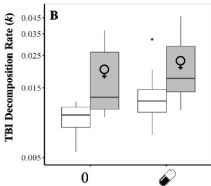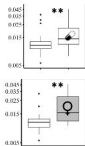

Source: https://www.biorxiv.org/content/biorxiv/early/2019/11/04/809426.full.pdf
